# Supplementary material for: Nationwide Statistical Analysis of Lymphoid Malignancies in Korea
Source: PubMed Central journal article supplement — Cancer Res Treat. 2017 Mar 30;50(1):222–38. doi: 10.4143/crt.2017.093 (PMC5784621; doi:10.4143/crt.2017.093), 2017-03-30
Supplement: crt-2017-093-suppl1.pdf [file crt-2017-093-suppl1.pdf]

**S1 Table.** Classification of lymphoid malignancies

| Site                                                    | ICD-O-3 code | ICD-O-3 description                                                |
|---------------------------------------------------------|--------------|--------------------------------------------------------------------|
| <b>Hodgkin's lymphoma</b>                               |              |                                                                    |
| Hodgkin's lymphoma, nodular lymphocyte predominant      | 9659         | Hodgkin's lymphoma, nodular lymphocyte predominant                 |
| Classical Hodgkin's lymphoma                            | 9650         | Hodgkin's lymphoma, NOS                                            |
|                                                         | 9661         | Hodgkin's granuloma [obsolete]                                     |
|                                                         | 9662         | Hodgkin's sarcoma [obsolete]                                       |
|                                                         | 9651         | HL, lymphocyte rich                                                |
|                                                         | 9663         | HL, nodular sclerosis, NOS                                         |
|                                                         | 9664         | HL, nodular sclerosis cellular phase                               |
|                                                         | 9665         | HL, nodular sclerosis grade 1                                      |
|                                                         | 9667         | HL, nodular sclerosis grade 2                                      |
|                                                         | 9652         | HL, mixed cellularity, NOS                                         |
|                                                         | 9653         | HL, lymphocyte depletion, NOS                                      |
|                                                         | 9654         | HL, lymphocyte depletion, diffuse fibrosis                         |
|                                                         | 9655         | HL, lymphocyte depletion, reticular                                |
| <b>Mature B-cell neoplasms</b>                          |              |                                                                    |
| Chronic lymphocytic leukemia/small lymphocytic lymphoma | 9670         | Malignant lymphoma, small B-cell lymphocytic, NOS                  |
|                                                         | 9823         | B-cell chronic lymphocytic leukemia/small lymphocytic lymphoma     |
| Immunoproliferative diseases                            | 9760         | Immunoproliferative disease, NOS                                   |
|                                                         | 9671         | Malignant lymphoma, lymphoplasmacytic                              |
|                                                         | 9761         | Waldenström's macroglobulinemia                                    |
|                                                         | 9762         | Heavy chain disease                                                |
| Mantle cell lymphoma                                    | 9673         | Mantle cell lymphoma                                               |
| Follicular lymphoma                                     | 9690         | Follicular lymphoma, NOS1                                          |
|                                                         | 9691         | Follicular lymphoma, grade 2                                       |
|                                                         | 9695         | Follicular lymphoma, grade 1                                       |
|                                                         | 9698         | Follicular lymphoma, grade 3                                       |
| Diffuse large B-cell lymphoma                           | 9675         | Malignant lymphoma, mixed small and large cell, diffuse [obsolete] |
|                                                         | 9678         | Primary effusion lymphoma                                          |
|                                                         | 9679         | Mediastinal large B-cell lymphoma                                  |
|                                                         | 9680         | Malignant lymphoma, large B-cell, diffuse, NOS                     |
|                                                         | 9684         | Malignant lymphoma, large B-cell, diffuse, immunoblastic, NOS      |
| Burkitt's lymphoma/leukemia                             | 9687         | Burkitt lymphoma, NOS                                              |
|                                                         | 9826         | Burkitt cell leukemia                                              |
| Marginal zone lymphoma                                  | 9689         | Splenic marginal zone B-cell lymphoma                              |

|                                                       |      |                                                                               |
|-------------------------------------------------------|------|-------------------------------------------------------------------------------|
|                                                       | 9699 | Marginal zone B-cell lymphoma, NOS/mucosa-associated lymphoid tissue lymphoma |
|                                                       | 9764 | Immunoproliferative small intestinal disease (Mediterranean lymphoma)         |
| B-cell prolymphocytic leukemia                        | 9833 | Prolymphocytic leukemia, B-cell type                                          |
| Hairy cell leukemia                                   | 9940 | Hairy cell leukemia                                                           |
| Plasma cell neoplasms                                 | 9732 | Multiple myeloma                                                              |
|                                                       | 9733 | Plasma cell leukemia                                                          |
|                                                       | 9731 | Plasmacytoma, NOS                                                             |
|                                                       | 9734 | Plasmacytoma, extramedullary                                                  |
| <b>Mature T-cell and NK-cell neoplasms</b>            |      |                                                                               |
| T lymphoma cutaneous                                  | 9700 | Mycosis fungoides                                                             |
|                                                       | 9701 | Sézary syndrome                                                               |
|                                                       | 9709 | Cutaneous T-cell lymphoma, NOS                                                |
|                                                       | 9718 | Primary cutaneous CD30 <sup>+</sup> T-cell lymphoproliferative disorder       |
|                                                       | 9708 | Subcutaneous T panniculitis-like T-cell lymphoma                              |
| Other T and NK- cell lymphomas                        | 9702 | Mature T-cell lymphoma, NOS                                                   |
|                                                       | 9705 | Angioimmunoblastic T-cell lymphoma                                            |
|                                                       | 9714 | Anaplastic large cell lymphoma, T-cell and null cell type                     |
|                                                       | 9716 | Hepatosplenic gamma delta cell lymphoma                                       |
|                                                       | 9717 | Intestinal T-cell lymphoma                                                    |
|                                                       | 9948 | Aggressive NK-cell leukemia                                                   |
|                                                       | 9719 | NK/T-cell lymphoma, nasal and nasal-type                                      |
|                                                       | 9827 | Adult T-cell leukemia/lymphoma (HTLV-1 positive)                              |
|                                                       | 9831 | T-cell large granular lymphocytic leukemia                                    |
|                                                       | 9834 | Prolymphocytic leukemia, T-cell type                                          |
| <b>Precursor cell neoplasms</b>                       |      |                                                                               |
| Lymphoblastic lymphoma                                | 9728 | Precursor B-cell lymphoblastic lymphoma                                       |
|                                                       | 9729 | Precursor T-cell lymphoblastic lymphoma                                       |
|                                                       | 9727 | Precursor cell lymphoblastic lymphoma, NOS                                    |
| Lymphoblastic leukemia                                | 9836 | Precursor B-cell lymphoblastic leukemia                                       |
|                                                       | 9837 | Precursor T-cell lymphoblastic leukemia                                       |
|                                                       | 9835 | Precursor cell lymphoblastic leukemia, NOS                                    |
| <b>Composite Hodgkin's and non-Hodgkin's lymphoma</b> | 9596 | Composite Hodgkin's and non-Hodgkin's lymphoma                                |
| <b>Unknown type lymphoid neoplasm</b>                 | 9590 | Malignant lymphoma, NOS                                                       |
|                                                       | 9591 | Malignant lymphoma, NHL, NOS                                                  |
|                                                       | 9820 | Lymphoid leukemia, NOS                                                        |
|                                                       | 9832 | Prolymphocytic leukemia, NOS                                                  |

---

ICD-O-3, International Classification of Diseases-for Oncology, third edition; NOS, not otherwise specified; HL, Hodgkin's lymphoma; NHL, non-Hodgkin's lymphoma.
